# Supplementary material for: Analysis of cell-associated DENV RNA by oligo(dT) primed 5’ capture scRNAseq
Source: PubMed Central journal article supplement (PMC7270085; doi:10.1038/s41598-020-65939-5), 2020-06-03
Supplement: 41598_2020_65939_MOESM2_ESM.pdf [file 41598_2020_65939_MOESM2_ESM.pdf]

## **Analysis of cell-associated DENV RNA by oligo(dT) primed 5' capture scRNAseq**

Mark A Sanborn, Tao Li, Kaitlin Victor, Hayden Siegfried, Christian Fung, Alan L. Rothman, Anon Srikiatkachorn, Stefan Fernandez, Damon Ellison, Richard G. Jarman, Heather Friberg, Irina Maljkovic Berry, Jeffrey R. Carrier, Adam T Waickman

### **Supplemental Figures**

# Supplemental Figure 1

## 10x Genomics “poly(dT)” primer

Non-Poly(dT)

Poly(dT)VN

5' - AAGCAGTGGTATCAACGCAGAGTAC - TTTTTTTTTTTTTTTTTTTTTTTTTTTTTTTTTTTT VN - 3'

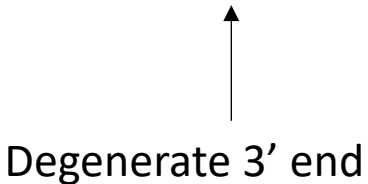

## DENV-specific primer

Non-Poly(dT)

DENV 3' UTR

5' - AAGCAGTGGTATCAACGCAGAGTAC - GAACCTGTTGATTCAACAGC - 3'

Supplemental Figure 1. Primer sequences utilized in this analysis. V = A, C, G. N = A, T, C, G.

# Supplemental Figure 2

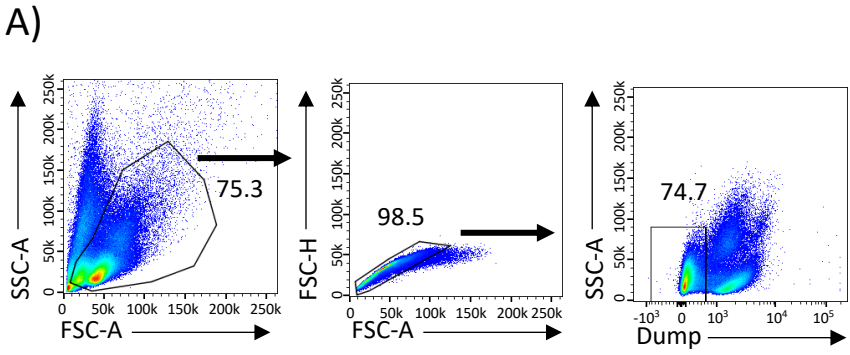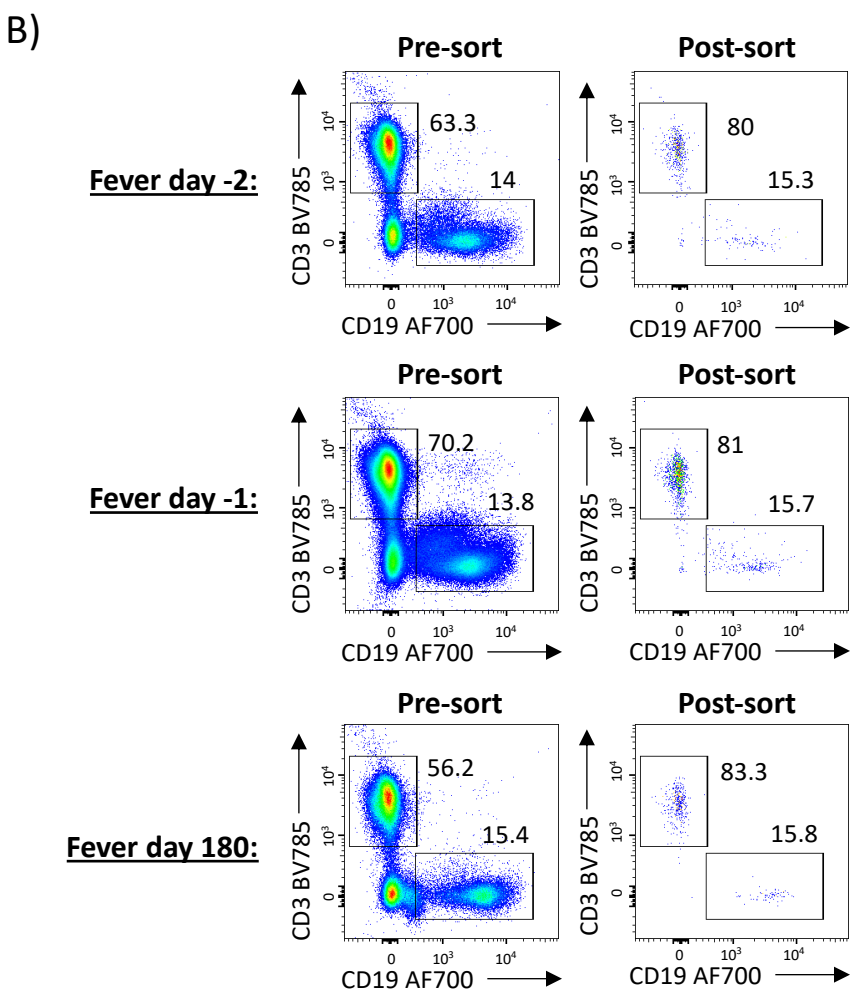

**Supplemental Figure 2.** Gating strategy and post-sort purity of PBMC samples analyzed by flow cytometry. **A)** Gating scheme used to identify and sort viable lymphocytes. **B)** Pre and post sort sample purity of CD3<sup>+</sup> T cells and CD19<sup>+</sup> B cells from all PBMC samples analyzed.

# Supplemental Figure 3

A)

Fever day -2: DENV-1 genome recovered from serum

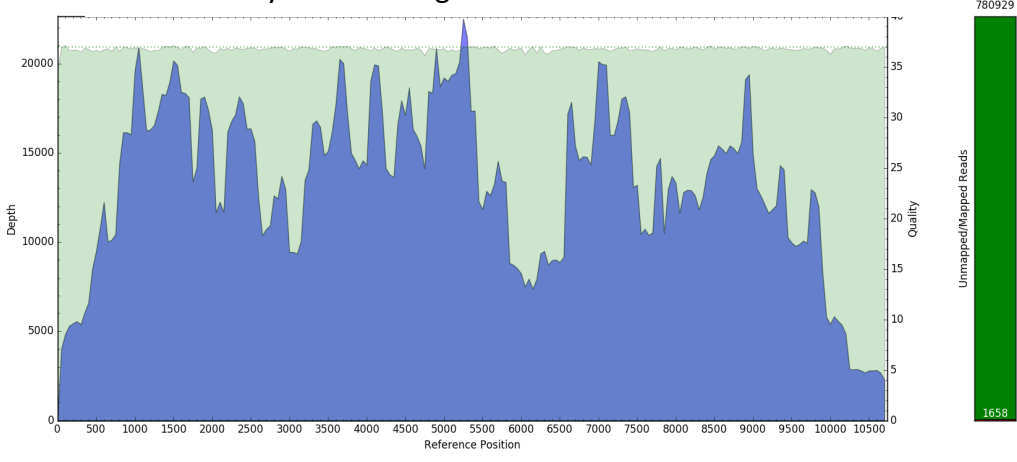

B)

Fever day -1: DENV-1 genome recovered from serum

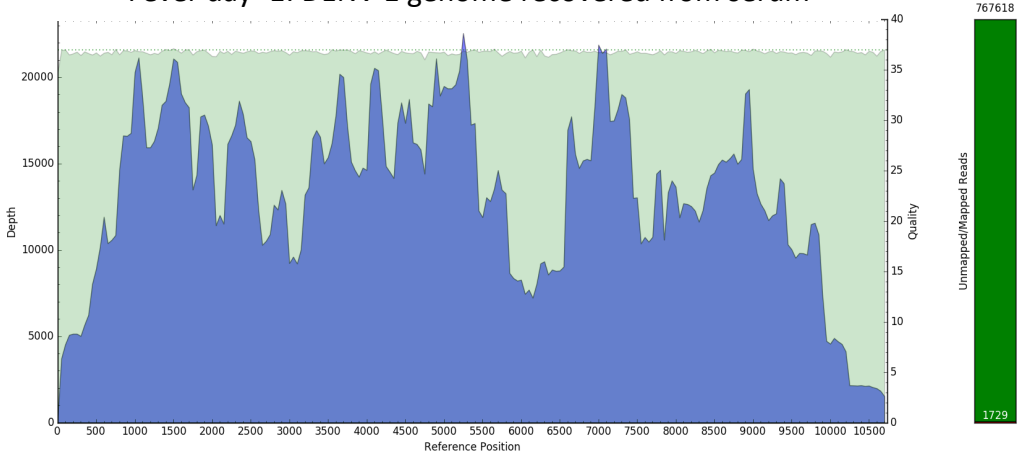

**Supplemental Figure 3.** Sequence coverage and depth of DENV-1 genomic RNA recovered from of serum. **A)** Sequence coverage from fever day -2 **B)** Sequence coverage from fever day -1

# Supplemental Figure 4

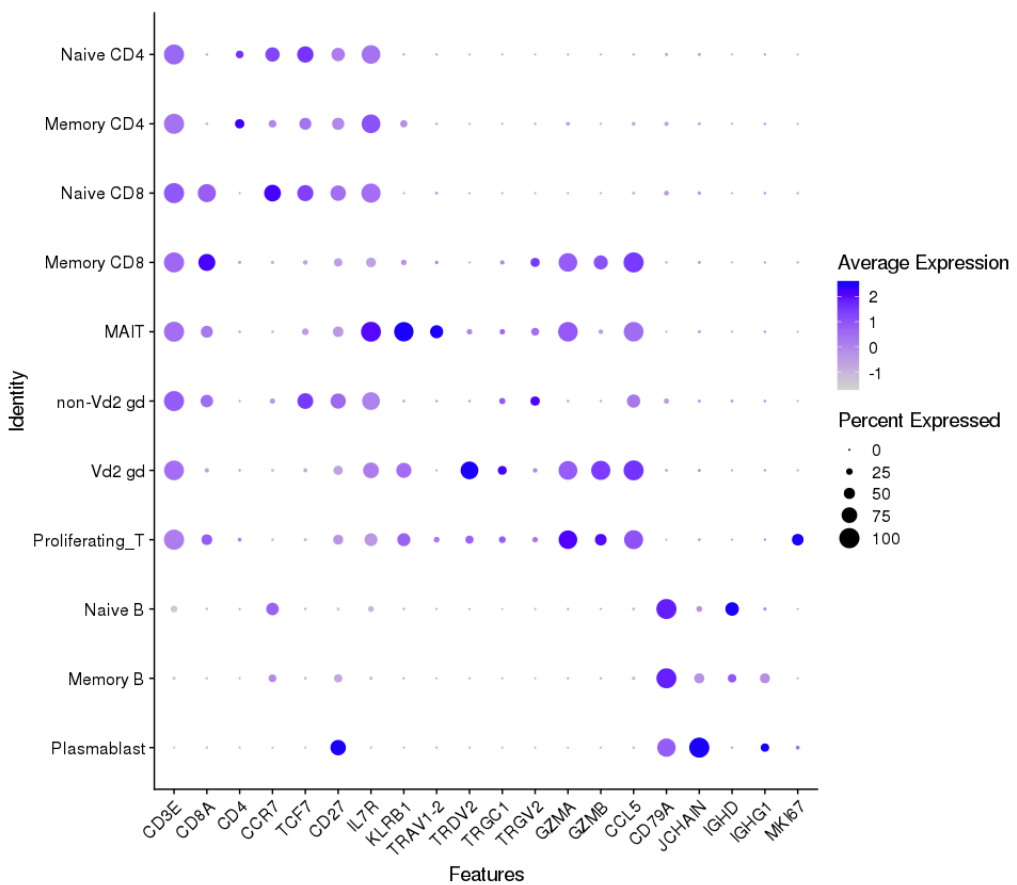

**Supplemental Figure 4.** Expression of key lineage-defining genes within the annotated populations identified by scRNAseq analysis of sorted CD3<sup>+</sup> T cells and CD19<sup>+</sup> B cells.

# Supplemental Figure 5

## Cell-associated DENV content

Fever day -2

Fever day -1

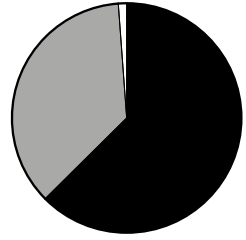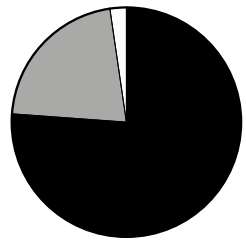

## DENV RNA detected

- Positive only
- Positive/negative
- Negative only

**Supplemental Figure 5. Characterization of negative-sense DENV RNA by 5' capture scRNAseq** Fraction of indicated cell populations containing either only positive-sense DENV RNA (black), both positive- and negative-sense DENV RNA (gray), or only negative-sense DENV RNA (white) as quantified by 5' capture scRNAseq.
